# Supplementary material for: Multiparameter Evaluation of the Platelet-Inhibitory Effects of Tyrosine Kinase Inhibitors Used for Cancer Treatment
Source: Int J Mol Sci. 2021 Oct 18;22(20):11199. doi: 10.3390/ijms222011199 (PMC8540269; doi:10.3390/ijms222011199)

**Dasatinib**

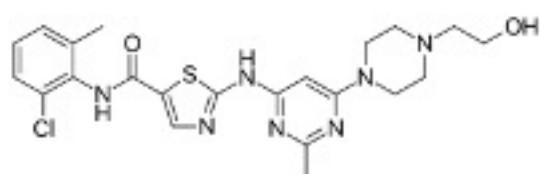

**Fostamatinib**

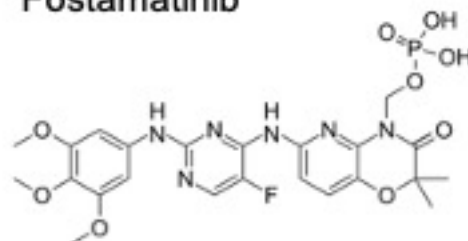

**Sunitinib**

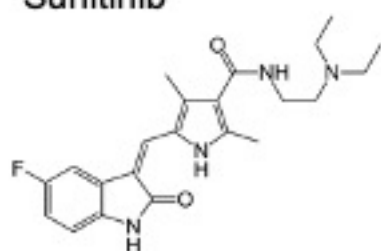

**Pazopanib**

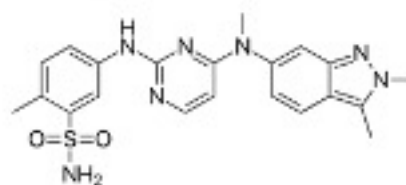

**Axitinib**

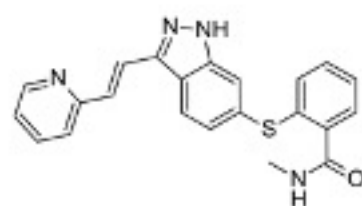

**Cabozantinib**

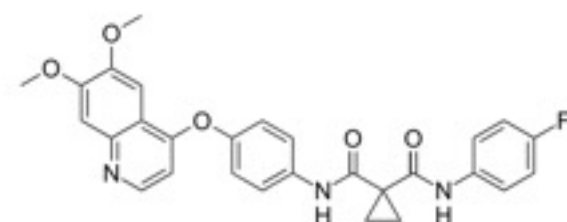

**Lapatinib**

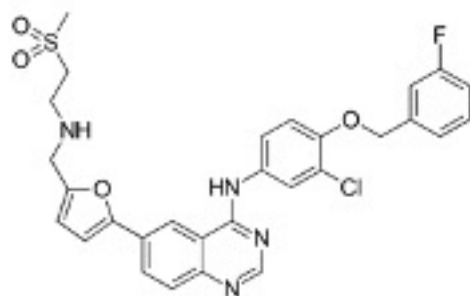

**Vatalanib**

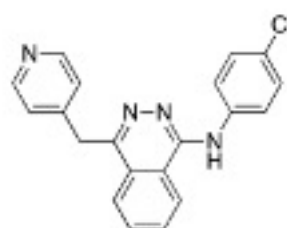

**Figure S1.** Molecular structures of tyrosine kinase inhibitors.

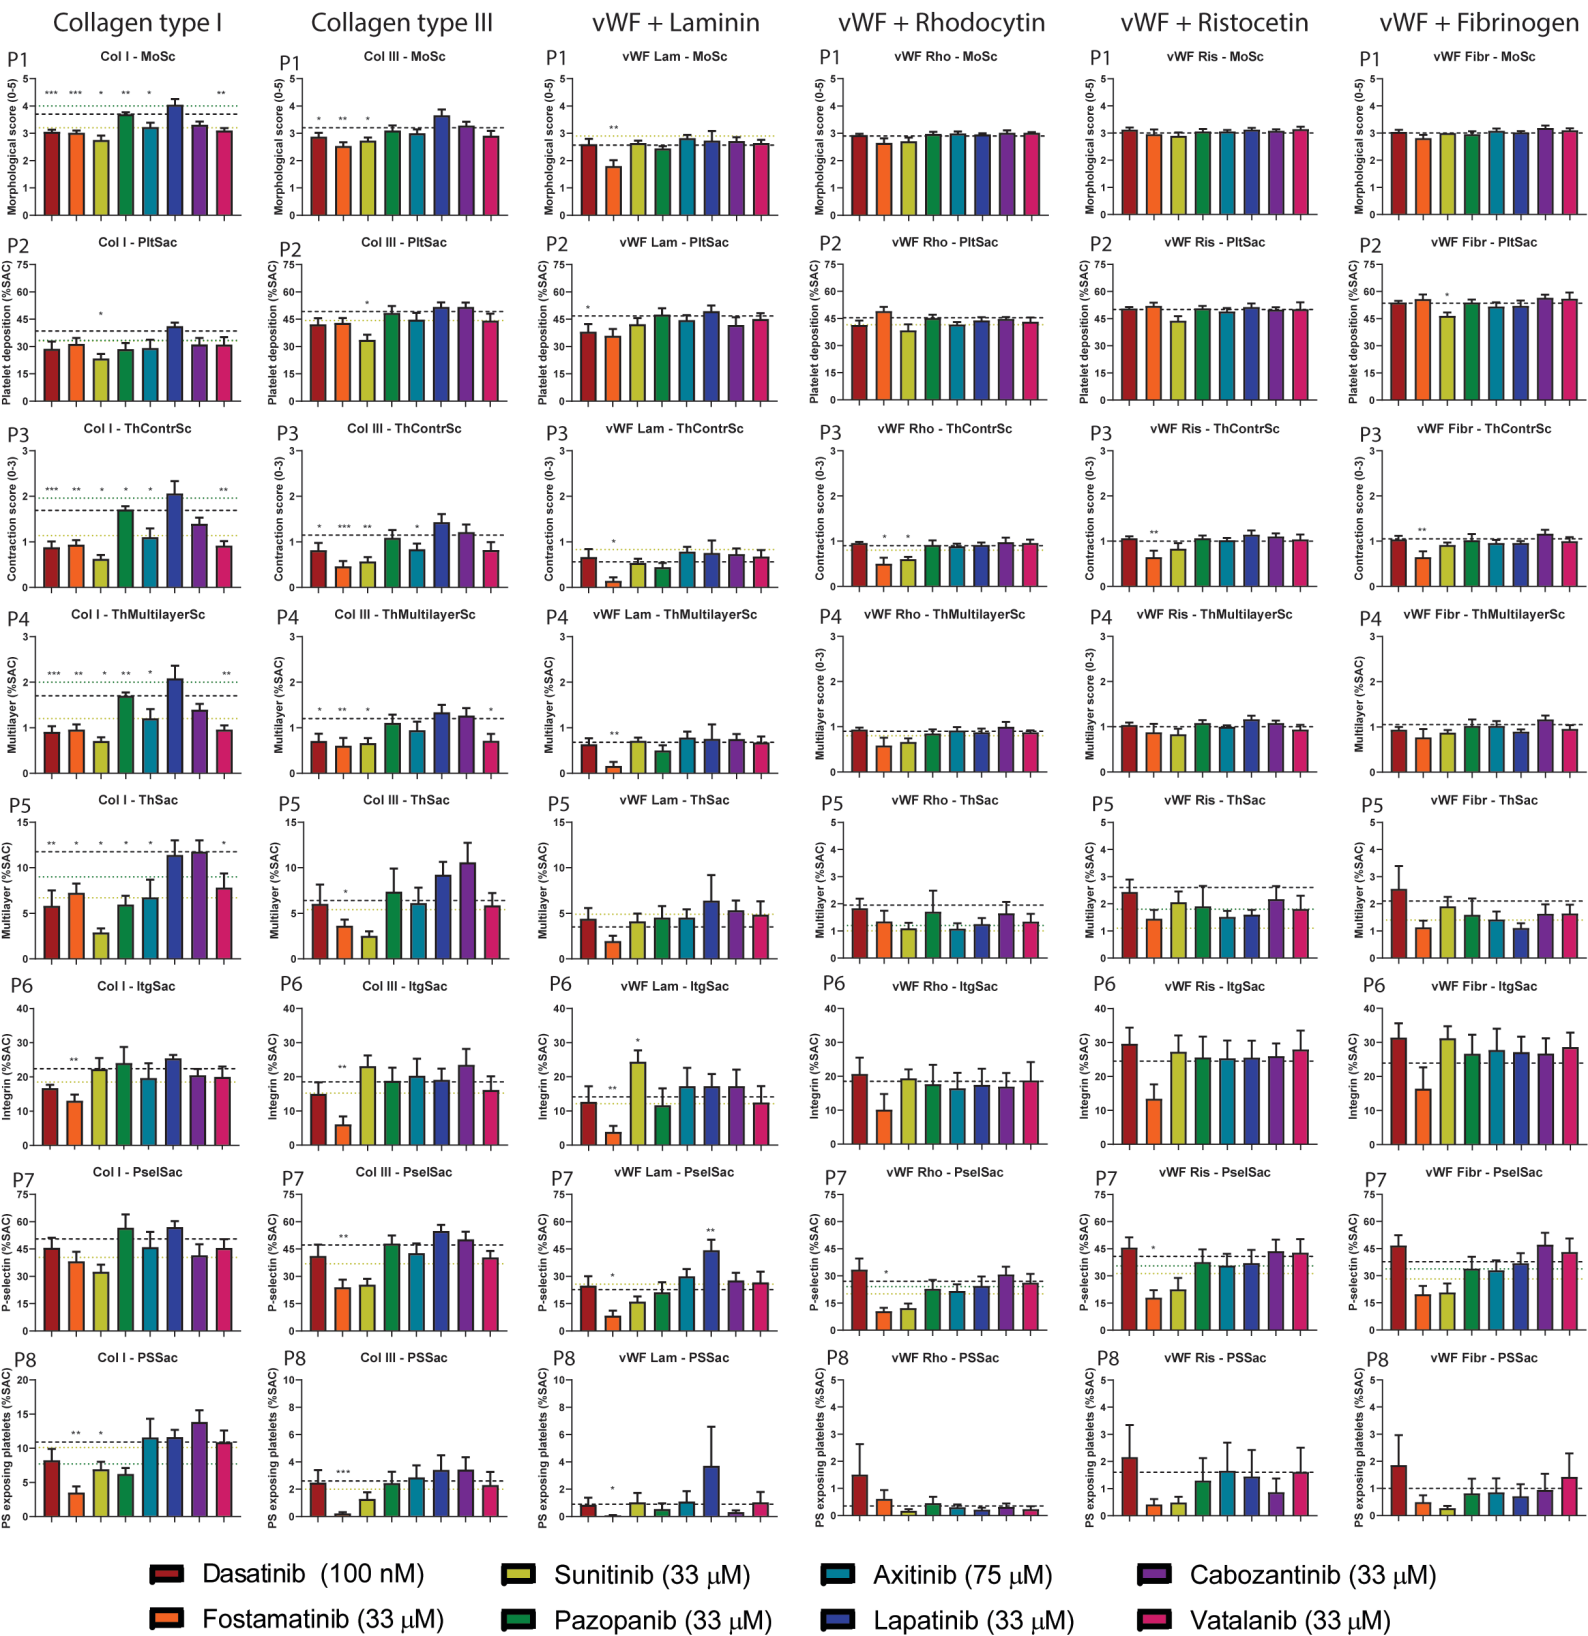

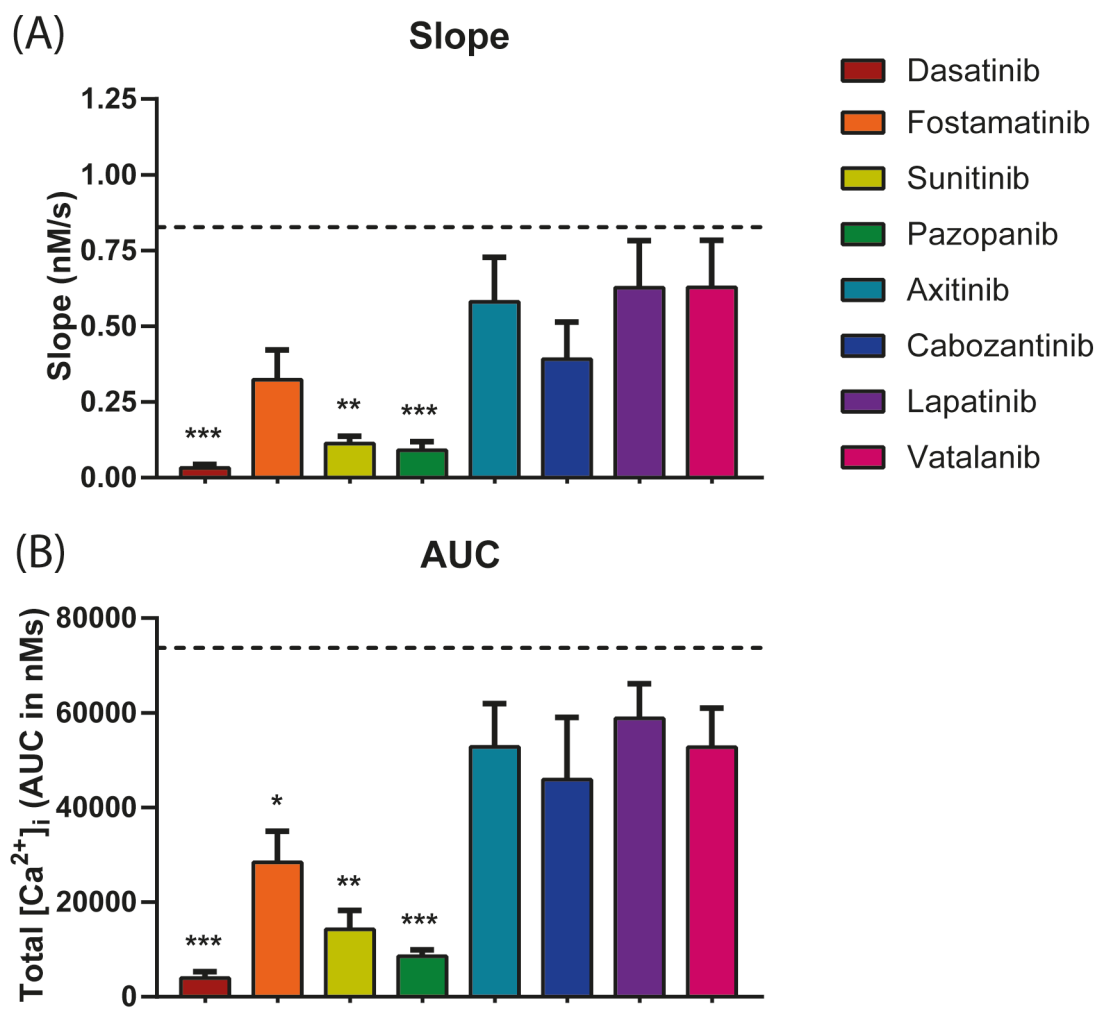

Supplement: Supplementary file 1 [file ijms-22-11199-s001.zip › ijms-1351684-figures S1-S3.pdf]
